# Supplementary material
Source: PubMed Central journal article supplement (PMC124352)
Supplement: pnas_112040099_2.pdf [file pnas_112040099_2.pdf]

# A

|          |     |                                                              |
|----------|-----|--------------------------------------------------------------|
| nematode | 1   | MVNFTVDEIRALMDKRNIRNMSVIAHVDHGKSTLTDLSVSKAGIITAGSKAGETRFDTFR |
| fruitfly | 1   | MVNFTVDEIRALMDKRNIRNMSVIAHVDHGKSTLTDLSVSKAGIITAGSKAGETRFDTFR |
| yeast    | 1   | MVNFTVDEIRALMDKRNIRNMSVIAHVDHGKSTLTDLSVSKAGIITAGSKAGETRFDTFR |
| LOSI     | 1   | MVKFTVDEIRALMDKRNIRNMSVIAHVDHGKSTLTDLSVSKAGIITAGSKAGETRFDTFR |
| nematode | 61  | KDEQERGITIKSTAIISLFEVEKDDLFVFCENQFETVEVDGKKEKYNGLINLIDSPGH   |
| fruitfly | 61  | KDEQERGITIKSTAIISLFEVEKDDLFVTHP-----DQBEKCKGFLINLIDSPGH      |
| Yeast    | 61  | ADQERGITIKSTAIISLAEVDDDDKDKKEP-----ADGTDPLINLIDSPGH          |
| LOSI     | 61  | ADQERGITIKSTAIISLYEMTDESLSKFTGAR-----DGNBFLINLIDSPGH         |
| nematode | 121 | VDFSSEVTAALRVTDGALVVVDCVSGVCVQETVLRQAIARIKPVLFMNMKDRALLELQ   |
| fruitfly | 113 | VDFSSEVTAALRVTDGALVVVDCVSGVCVQETVLRQAIARIKPVLFMNMKDRALLELQ   |
| yeast    | 109 | VDFSSEVTAALRVTDGALVVVDCVSGVCVQETVLRQALGERIRPVVFNKMDRALLELQ   |
| LOSI     | 109 | VDFSSEVTAALRVTDGALVVVDCVSGVCVQETVLRQALGERIRPVVFNKMDRALLELQ   |
| nematode | 181 | LDABELYQTFQRIVENVNVIIATYNDGDPGCPHVDPSHCVNVPFGSGLHGWAFTLKQFA  |
| fruitfly | 173 | LDABELYQTFQRIVENVNVIIATYNDGDPGCPHVDPSHCVNVPFGSGLHGWAFTLKQFA  |
| yeast    | 169 | LDABELYQTFQRIVENVNVIIATYNDGDPGCPHVDPSHCVNVPFGSGLHGWAFTLKQFA  |
| LOSI     | 169 | LDABELYQTFQRIVENVNVIIATYNDGDPGCPHVDPSHCVNVPFGSGLHGWAFTLKQFA  |
| nematode | 241 | EMYSKFKGLDVKLMKNLWGRFFDLTKKWSKTDDES---KRGFCQVLDPIEMVFD       |
| fruitfly | 233 | EMYSKFKGLDVKLMKNLWGRFFDLTKKWSKTDDES---KRGFCQVLDPIEMVFD       |
| yeast    | 227 | NRYAKFKGLDVKLMKNLWGRFFDLTKKWSKTDDES---KRGFCQVLDPIEMVFD       |
| LOSI     | 227 | KMYAKFKGLDVKLMKNLWGRFFDLTKKWSKTDDES---KRGFCQVLDPIEMVFD       |
| nematode | 297 | AVMNSKDKTAALVEKLGKLANDEKLEGRKPKVPMRKLWLPAGDITLQMLAHPHPSPV    |
| fruitfly | 289 | AVMNSKDKTAALVEKLGKLANDEKLEGRKPKVPMRKLWLPAGDITLQMLAHPHPSPV    |
| yeast    | 287 | AVMNSKDKTAALVEKLGKLANDEKLEGRKPKVPMRKLWLPAGDITLQMLAHPHPSPV    |
| LOSI     | 285 | AVMNSKDKTAALVEKLGKLANDEKLEGRKPKVPMRKLWLPAGDITLQMLAHPHPSPV    |
| nematode | 357 | TAQKYRMEMLYEGPHDDEAAVAIKTCDPNGPLMMYISKMVPVSDKGRFYAFGRVFSQKVA |
| fruitfly | 349 | TAQKYRMEMLYEGPHDDEAAVAIKTCDPNGPLMMYISKMVPVSDKGRFYAFGRVFSQKVA |
| yeast    | 347 | TAQKYRMEMLYEGPHDDEAAVAIKTCDPNGPLMMYISKMVPVSDKGRFYAFGRVFSQKVA |
| LOSI     | 345 | TAQKYRMEMLYEGPHDDEAAVAIKTCDPNGPLMMYISKMVPVSDKGRFYAFGRVFSQKVA |
| nematode | 417 | TGMKVRITGPNVYVPGKEDLYEKIORTILMMGRFTEPIEDIPSGNITGLVGVDFLVKQ   |
| fruitfly | 409 | TGMKVRITGPNVYVPGKEDLYEKIORTILMMGRFTEPIEDIPSGNITGLVGVDFLVKQ   |
| yeast    | 407 | TGMKVRITGPNVYVPGKEDLYEKIORTILMMGRFTEPIEDIPSGNITGLVGVDFLVKQ   |
| LOSI     | 405 | TGMKVRITGPNVYVPGKEDLYEKIORTILMMGRFTEPIEDIPSGNITGLVGVDFLVKQ   |
| nematode | 477 | GTITTT--YKDAHNMVMKFSVSPVVRVAVAKNPADLPKLVGLKRLAKSDPMVCTIEE    |
| fruitfly | 469 | GTITTT--YKDAHNMVMKFSVSPVVRVAVAKNPADLPKLVGLKRLAKSDPMVCTIEE    |
| yeast    | 467 | GTITTT--SEVAHNMVMKFSVSPVVRVAVAKNPADLPKLVGLKRLAKSDPMVCTIEE    |
| LOSI     | 465 | GTITTT--YKDAHNMVMKFSVSPVVRVAVAKNPADLPKLVGLKRLAKSDPMVCTIEE    |
| * C → Y  |     |                                                              |
| nematode | 535 | SGEHIYAGAGELHLEICLKDLEBDHAC--IPLKKSPPVVSRETQVSESNQICLSKSPNKH |
| fruitfly | 527 | SGEHIYAGAGELHLEICLKDLEBDHAC--IPLKKSPPVVSRETQVSESNQICLSKSPNKH |
| yeast    | 525 | SGEHIYAGAGELHLEICLKDLEBDHAG--IPLKKSPPVVSRETQVSESNQICLSKSPNKH |
| LOSI     | 525 | SGEHIYAGAGELHLEICLKDLEBDHAG--IPLKKSPPVVSRETQVSESNQICLSKSPNKH |
| nematode | 594 | NRLHCTAOPMPDGLADTIEGQTVNARDEFKARAKILAKKEMDVTIARKIWCFGPDTGPF  |
| fruitfly | 586 | NRLHCTAOPMPDGLADTIEGQTVNARDEFKARAKILAKKEMDVTIARKIWCFGPDTGPF  |
| yeast    | 584 | NRLHCTAOPMPDGLADTIEGQTVNARDEFKARAKILAKKEMDVTIARKIWCFGPDTGPF  |
| LOSI     | 585 | NRLHCTAOPMPDGLADTIEGQTVNARDEFKARAKILAKKEMDVTIARKIWCFGPDTGPF  |
| nematode | 654 | NMLNDYTKGVQVYLNKIDSVVAGFQWASKGGLADENIRGVRFNVDVTLHADAIHRGGG   |
| fruitfly | 646 | NMLNDYTKGVQVYLNKIDSVVAGFQWASKGGLADENIRGVRFNVDVTLHADAIHRGGG   |
| yeast    | 644 | NMLNDYTKGVQVYLNKIDSVVAGFQWASKGGLADENIRGVRFNVDVTLHADAIHRGGG   |
| LOSI     | 645 | NMLNDYTKGVQVYLNKIDSVVAGFQWASKGGLADENIRGVRFNVDVTLHADAIHRGGG   |
| nematode | 714 | QIIPTRRRTYASVLTAKPRLLPEVYVVEIQCPPEAVGGIYVNLNRRGRHVFEBSQVGT   |
| fruitfly | 706 | QIIPTRRRTYASVLTAKPRLLPEVYVVEIQCPPEAVGGIYVNLNRRGRHVFEBSQVGT   |
| yeast    | 704 | QIIPTRRRTYASVLTAKPRLLPEVYVVEIQCPPEAVGGIYVNLNRRGRHVFEBSQVGT   |
| LOSI     | 705 | QIIPTRRRTYASVLTAKPRLLPEVYVVEIQCPPEAVGGIYVNLNRRGRHVFEBSQVGT   |
| nematode | 774 | PLNRYKAYLPVNESFGFTADLRSNTGQAFQCVFDHWQVLPDPLEPAGKFNQIVQDTR    |
| fruitfly | 766 | PLNRYKAYLPVNESFGFTADLRSNTGQAFQCVFDHWQVLPDPLEPAGKFNQIVQDTR    |
| yeast    | 764 | PLNRYKAYLPVNESFGFTADLRSNTGQAFQCVFDHWQVLPDPLEPAGKFNQIVQDTR    |
| LOSI     | 765 | PLNRYKAYLPVNESFGFTADLRSNTGQAFQCVFDHWQVLPDPLEPAGKFNQIVQDTR    |
| nematode | 834 | KRGLKEGVPADNLYDKM                                            |
| fruitfly | 826 | KRGLKEGVPADNLYDKM                                            |
| yeast    | 824 | KRGLKEGVPADNLYDKM                                            |
| LOSI     | 825 | KRGLKEGVPADNLYDKM                                            |

# B

|              |                                                      |
|--------------|------------------------------------------------------|
| LOSI         | KEVDAHPIRAMKFSVSPVVRVAVQCKVASDLPKLVGLKRLAKSDPMVCTIEE |
| broomcorn    | KEVDAHPIRAMKFSVSPVVRVAVQCKVASDLPKLVGLKRLAKSDPMVCTIEE |
| wheat        | KEVDAHPIRAMKFSVSPVVRVAVQCKVASDLPKLVGLKRLAKSDPMVCTIEE |
| winter rye   | KEVDAHPIRAMKFSVSPVVRVAVQCKVASDLPKLVGLKRLAKSDPMVCTIEE |
| maize        | KEVDAHPIRAMKFSVSPVVRVAVQCKVASDLPKLVGLKRLAKSDPMVCTIEE |
| barley       | KEVDAHPIRAMKFSVSPVVRVAVQCKVASDLPKLVGLKRLAKSDPMVCTIEE |
| tomato       | KEVDAHPIRAMKFSVSPVVRVAVQCKVASDLPKLVGLKRLAKSDPMVCTIEE |
| potato       | KEVDAHPIRAMKFSVSPVVRVAVQCKVASDLPKLVGLKRLAKSDPMVCTIEE |
| ice plant    | KEVDAHPIRAMKFSVSPVVRVAVQCKVASDLPKLVGLKRLAKSDPMVCTIEE |
| beet         | KEVDAHPIRAMKFSVSPVVRVAVQCKVASDLPKLVGLKRLAKSDPMVCTIEE |
| barrel medic | KEVDAHPIRAMKFSVSPVVRVAVQCKVASDLPKLVGLKRLAKSDPMVCTIEE |
| soybean      | KEVDAHPIRAMKFSVSPVVRVAVQCKVASDLPKLVGLKRLAKSDPMVCTIEE |
| tree cotton  | KEVDAHPIRAMKFSVSPVVRVAVQCKVASDLPKLVGLKRLAKSDPMVCTIEE |
| rice         | KEVDAHPIRAMKFSVSPVVRVAVQCKVASDLPKLVGLKRLAKSDPMVCTIEE |

\* C → Y
